# Supplementary material
Source: publisher figshare collection journal article supplement (https://acs.figshare.com/ndownloader/files/10380804)
Supplement: Supplementary file 1 [file 10380804]

# Potent Inhibitors of Mycobacterium Tuberculosis Growth Identified by Using In-Cell NMR-based screening

Christopher M. DeMott<sup>1</sup>, Roxie Girardin<sup>2</sup>, Jacqueline Cobbert<sup>1</sup>, Sergey Reverdatto<sup>1</sup>,  
David S. Burz<sup>1</sup>, Kathleen McDonough<sup>2,3</sup>, Alexander Shekhtman<sup>1\*</sup>

<sup>1</sup> Department of Chemistry,<sup>2</sup> University at Albany, State University of New York, Albany, NY 12222

<sup>2</sup> Wadsworth Center, New York Department of Health, Albany, NY 12208

<sup>3</sup> Department of Biomedical Sciences, University at Albany, State University of New York, Albany, NY 12222

\* Corresponding Author, email: [ashekhtman@albany.edu](mailto:ashekhtman@albany.edu)

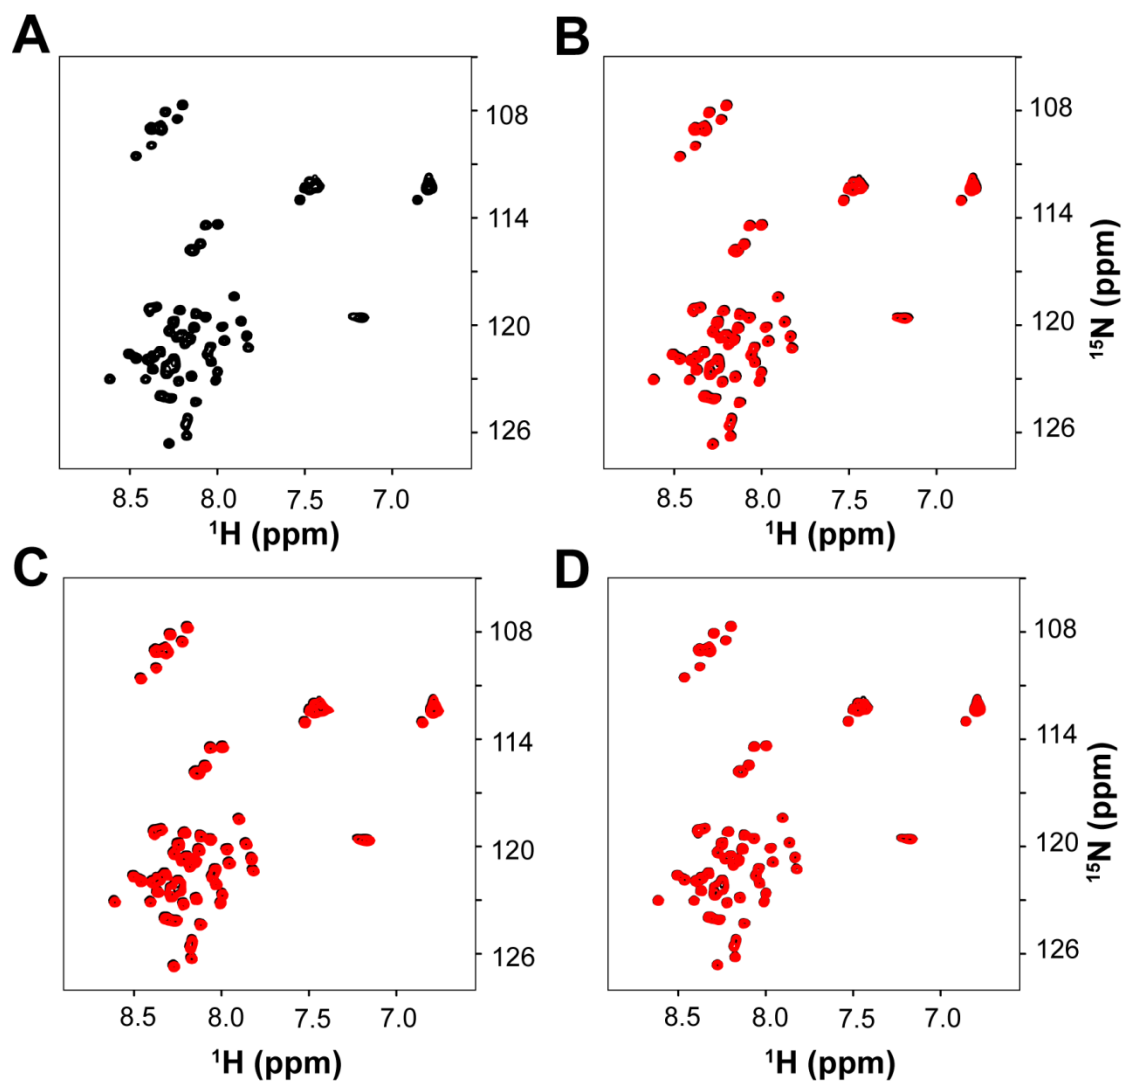

**Supplemental Figure 1.** Pup-Mpa complex is required to bind candidate compounds. **(A)** *In vitro*  $^1\text{H}$ - $^{15}\text{N}$  HSQC spectrum of Pup. **(B, C, D)** *In vitro*  $^1\text{H}$ - $^{15}\text{N}$  HSQC spectra of Pup with compounds MTBA (B), MTBB (C), and MTBC (D). Pup concentration was 50  $\mu\text{M}$  in 10 mM potassium phosphate buffer, pH 7.2; MTBA, MTBB and MTBC were at 100  $\mu\text{M}$ . All baseline spectra contained 1.0% DMSO.

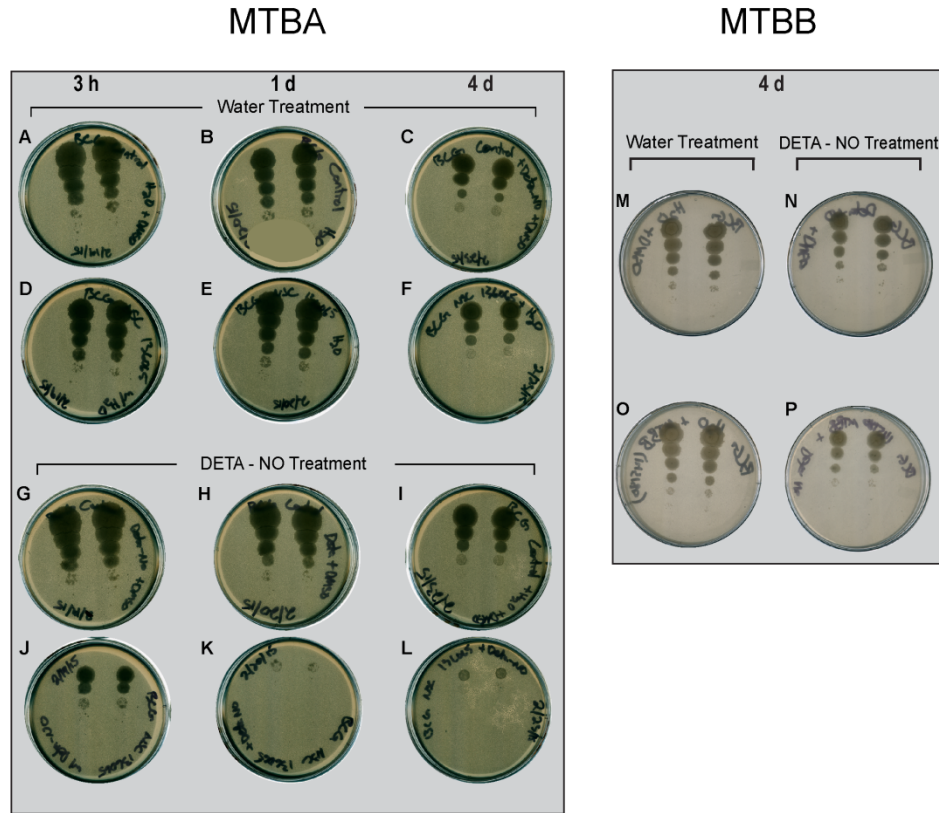

**Supplemental Figure 2.** Compounds MTBA and MTBB require nitric oxide stress to kill BCG cells. Control cells at 3 h (A), 1 d (B), 4 d (C) post-treatment. Control +100  $\mu$ M MTBA at 3 h (D), 1 d (E), 4 d (F). DETA-NO Control at 3 h (G), 1 d (H), 4 d (I). DETA-NO +100  $\mu$ M MTBA at 3 h (J), 1 d (K), 4 d (L). Control cells at 4 d (M). DETA-NO Control at 4 d (N). Control +100  $\mu$ M MTBB at 4 d (O). DETA-NO +100  $\mu$ M MTBB at 4 d (P). DETA-NO was at 250  $\mu$ M; MTBA and MTBB were at 100  $\mu$ M.

A

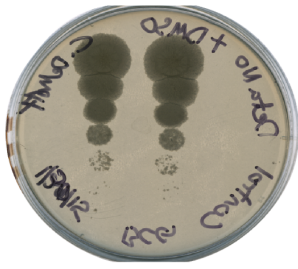

B

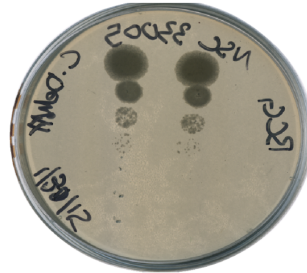

**Supplemental Figure 3.** MTBC maintains BCG growth inhibition 8 days post-treatment. **(A)** Control treated with 250  $\mu$ M DETA-NO, and DMSO (0.5% v/v). **(B)** BCG treated with 100  $\mu$ M MTBC.

**Supplementary Table 1.** Small molecule screening data

| Category            | Parameter                                | Description                                                                                                                                                        |
|---------------------|------------------------------------------|--------------------------------------------------------------------------------------------------------------------------------------------------------------------|
| Assay               | Type of assay                            | In-cell NMR                                                                                                                                                        |
|                     | Target                                   | Pup and Mpa interaction                                                                                                                                            |
|                     | Primary measurement                      | $^1\text{H}$ - $^{15}\text{N}$ HSQC                                                                                                                                |
|                     | Key reagents                             | <i>E. coli</i> with 2 h [ $U$ - $^{15}\text{N}$ ]-Pup and 8 h Mpa over-expression, matrix of compounds in DMSO (neat), NMR buffer (pH 6.5), 99.8% D <sub>2</sub> O |
|                     | Assay protocol                           | DOI:10.1021/jm9000743<br>10.1002/0471140864.ps1711s61                                                                                                              |
| Library             | Additional comments                      |                                                                                                                                                                    |
|                     | Library size                             | 1597                                                                                                                                                               |
|                     | Library composition                      | NIH/NCI Diversity Set III                                                                                                                                          |
|                     | Source                                   | NCI Developmental Therapeutics Program (DTP)                                                                                                                       |
| Screen              | Additional comments                      | Library is not <i>Mtb</i> specific                                                                                                                                 |
|                     | Format                                   | 96-well format                                                                                                                                                     |
|                     | Concentration(s) tested                  | 50 $\mu\text{M}$                                                                                                                                                   |
|                     | Plate controls                           | 4% and 5% DMSO                                                                                                                                                     |
|                     | Detection instrument and software        | 500 MHz Bruker NMR, Topspin 3.1 (Bruker), CARA                                                                                                                     |
|                     | Assay validation/QC                      | Inspection of $^{15}\text{N}$ -Pup chemical shift changes due to overexpression of Mpa                                                                             |
|                     | Normalization                            | Singular Value Decomposition (SVD)                                                                                                                                 |
| Post-HTS analysis   | Additional comments                      |                                                                                                                                                                    |
|                     | Hit criteria                             | Viability of BCG under NO-treatment                                                                                                                                |
|                     | Hit rate                                 | 0.20%                                                                                                                                                              |
|                     | Additional assay(s)                      | <i>In vitro</i> and <i>in vivo</i> functional studies                                                                                                              |
|                     | Confirmation of hit purity and structure | NMR spectroscopy                                                                                                                                                   |
| Additional comments | Additional comments                      |                                                                                                                                                                    |

**Supplemental Table 2. Compounds that advanced to *in vivo* screening.**

| Compound Name                                               | NSC Number | Shorthand Name | Chemical Structure                                                                   |
|-------------------------------------------------------------|------------|----------------|--------------------------------------------------------------------------------------|
| (E)-4-(phenyldiazenyl)morpholine                            | 136065     | MTBA           | 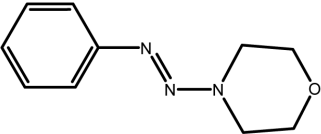  |
| 6-methyl-[1,2,4]triazolo[1,5-a][1,3,5]triazine-7(6H)-thione | 145180     | MTBB           |   |
| 4-(benzo[d]thiazol-2-yl)benzene-1,3-diol                    | 33005      | MTBC           |  |
